# Supplementary figures and images for: Electron cryo-microscopy of bacteriophage PR772 reveals the elusive vertex complex and the capsid architecture
Source: eLife journal article supplement (doi:10.7554/elife.48496), 2019-09-12

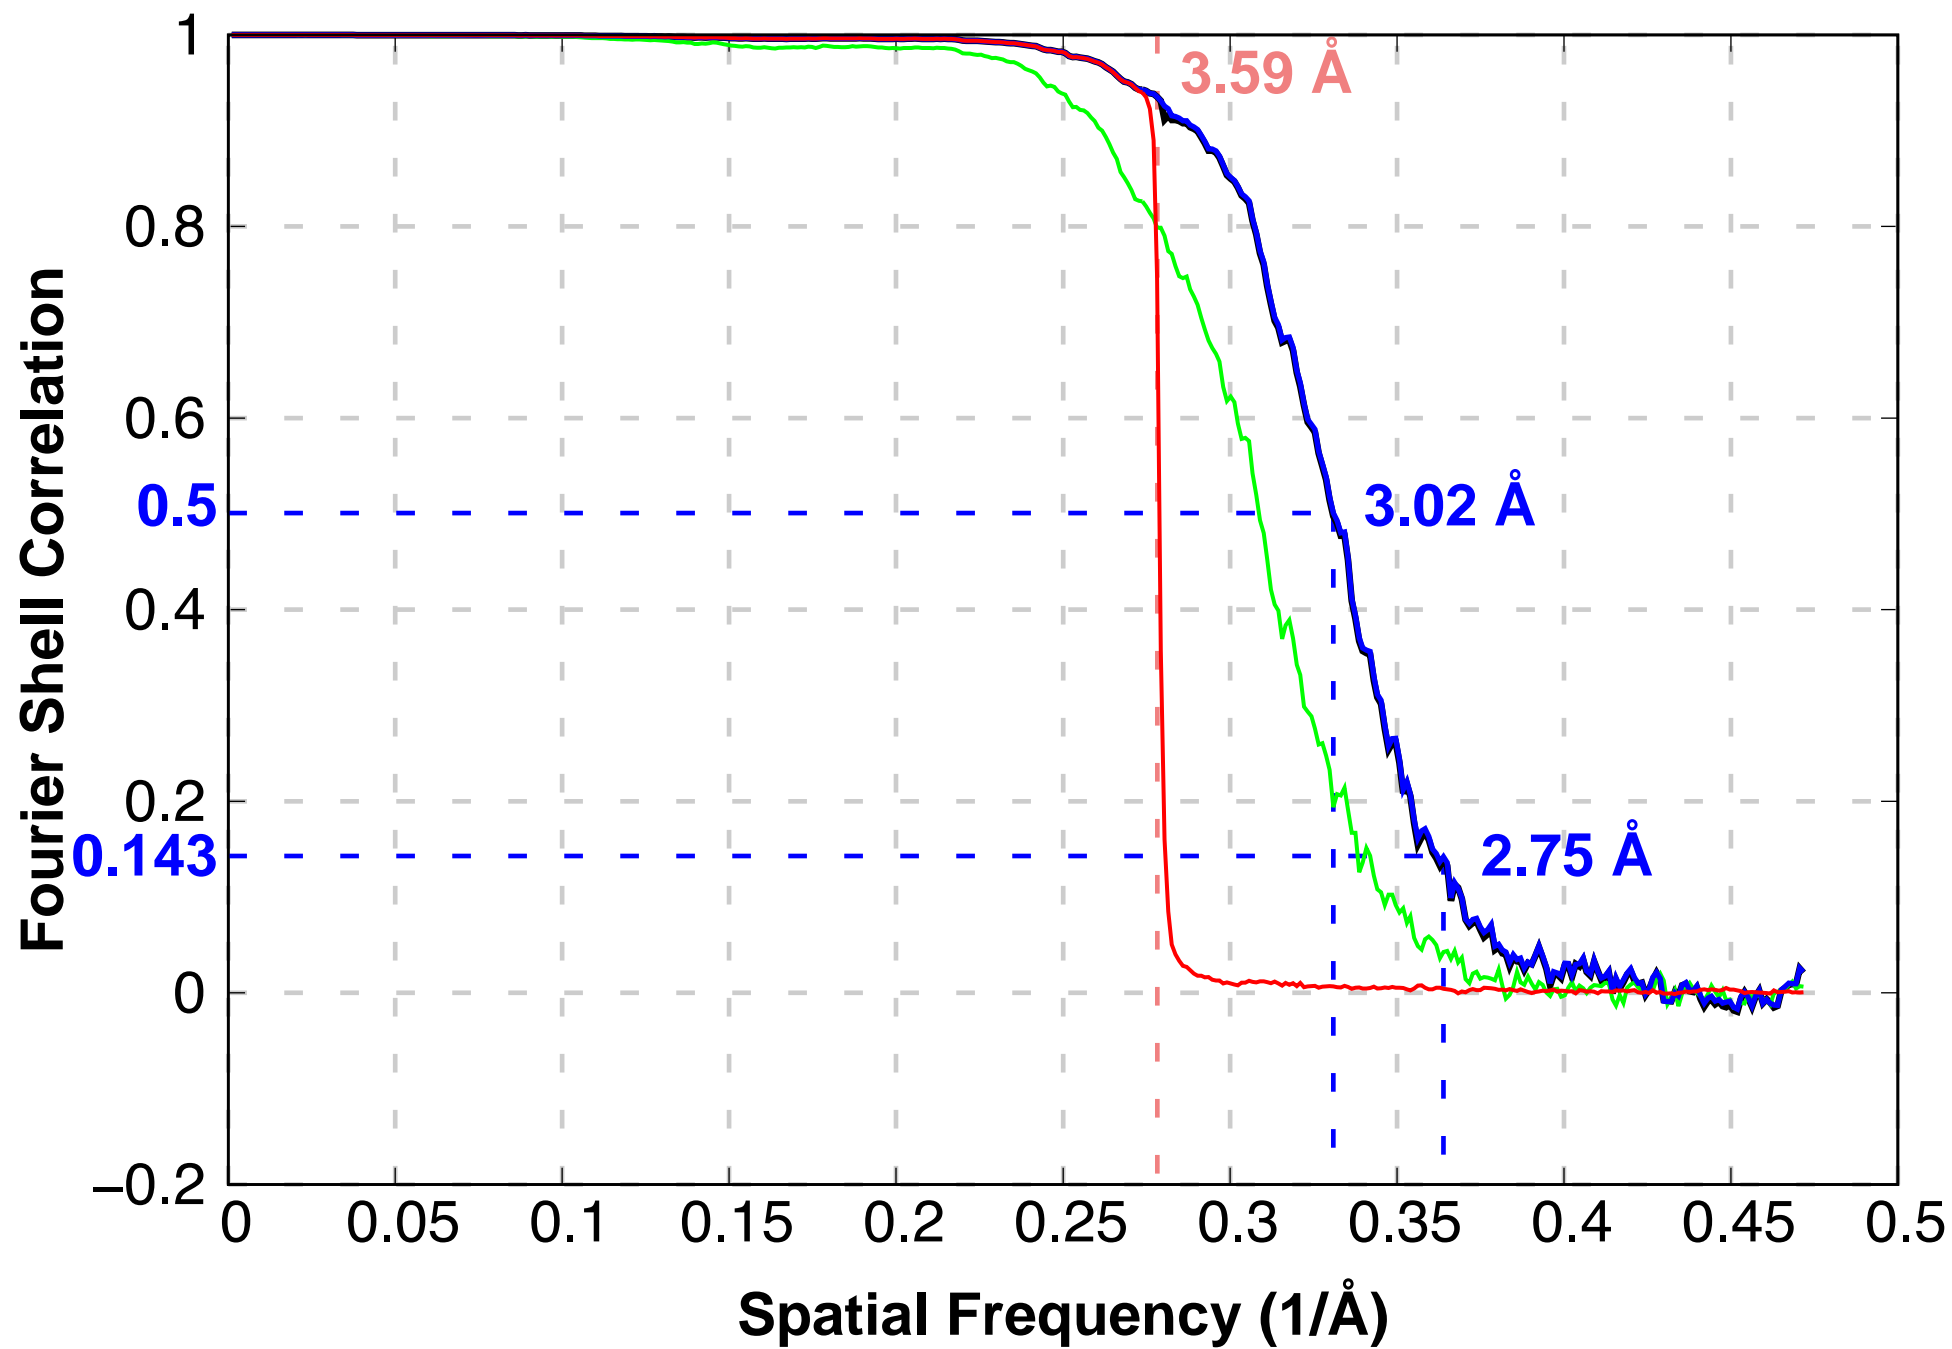

Supplement: supp [file elife_poa_e48496_Figure_1_figure_supplement_1.pdf › elife_poa_e48496_Figure_1_figure_supplement_1.pdf]
